# Supplementary material
Source: PubMed Central journal article supplement (PMC5930910)
Supplement: tpmd170733.SD1.pdf [file tpmd170733.SD1.pdf]

```

gi|840909 -----AATGAATTTCTACAGTGTGGCTAACTCTAACTGTTTGTGCGAATGGTCATTGTCAAATATTGTGATAATCCCATTTTAGTTAAGAATAATAC
gi|126256597 -----AATGAATTTCTACAGTGTGGCTAACTCTAACTGTTTGTGCGAATGGTCATTGTCAAATATTGTGATAATCCCATTTTAGTTAAGAATAATAC
gi|1519269989 TCGGCACGCTCGGTTTCAGGGTTGTTAATGAATTTCTACAGTGTGGCTAACTCTAACTGTTTGTGCGAATGGTCATTGTCAAATATTGTGATAATCCCATTTTAGTTAAGAATAATAC
gi|397701761 TCGGCACGCTCGGTTTCAGGGTTGTTAATGAATTTCTACAGTGTGGCTAACTCTAACTGTTTGTGCGAATGGTCATTGTCAAATATTGTGATAATCCCATTTTAGTTAAGAATAATAC
gi|323434337 -----AATAAATTTCTACAGTGTGGCTAACTCTAACTGTTTGTGCGAATGGTCATTGTCAAATATTGTGATAATCCCATTTTAGTTAAGAATAATAC
gi|314950527 TCGGCACGCTCGGTTTCAGGGTTGTTAATGAATTTCTACAGTGTGGCTAACTCTAACTGTTTGTGCGAATGGTCATTGTCAAATATTGTGATAATCCCATTTTAGTTAAGAATAATAC
gi|345523130 TCGGCACGCTCGGTTTCAGGGTTGTTAATGAATTTCTACAGTGTGGCTAACTCTAACTGTTTGTGCGAATGGTCATTGTCAAATATTGTGATAATCCCATTTTAGTTAAGAATAATAC
gi|1519270180 TCGGCACGCTCGGTTTCAGGGTTGTTAATGAATTTCTACAGTGTGGCTAACTCTAACTGTTTGTGCGAATGGTCATTGTCAAATATTGTGATAATCCCATTTTAGTTAAGAATAATAC
gi|1519270103 TCGGCACGCTCGGTTTCAGGGTTGTTAATGAATTTCTACAGTGTGGCTAACTCTAACTGTTTGTGCGAATGGTCATTGTCAAATATTGTGATAATCCCATTTTAGTTAAGAATAATAC
gi|1519270063 TCGGCACGCTCGGTTTCAGGGTTGTTAATGAATTTCTACAGTGTGGCTAACTCTAACTGTTTGTGCGAATGGTCATTGTCAAATATTGTGATAATCCCATTTTAGTTAAGAATAATAC
gi|1519269852 TCGGCACGCTCGGTTTCAGGGTTGTTAATGAATTTCTACAGTGTGGCTAACTCTAACTGTTTGTGCGAATGGTCATTGTCAAATATTGTGATAATCCCATTTTAGTTAAGAATAATAC
gi|322688145 TCGGCACGCTCGGTTTCAGGGTTGTTAATGAATTTCTACAGTGTGGCTAACTCTAACTGTTTGTGCGAATGGTCATTGTCAAATATTGTGATAATCCCATTTTAGTTAAGAATAATAC
gi|584592999 TCGGCACGCTCGGTTTCAGGGTTGTTAATGAATTTCTACAGTGTGGCTAACTCTAACTGTTTGTGCGAATGGTCATTGTCAAATATTGTGATAATCCCATTTTAGTTAAGAATAATAC
gi|584592998 TCGGCACGCTCGGTTTCAGGGTTGTTAATGAATTTCTACAGTGTGGCTAACTCTAACTGTTTGTGCGAATGGTCATTGTCAAATATTGTGATAATCCCATTTTAGTTAAGAATAATAC
gi|584592997 TCGGCACGCTCGGTTTCAGGGTTGTTAATGAATTTCTACAGTGTGGCTAACTCTAACTGTTTGTGCGAATGGTCATTGTCAAATATTGTGATAATCCCATTTTAGTTAAGAATAATAC
gi|126256599 -----AATGAATTTCTACAGTGTGGCTAACTCTAACTGTTTGTGCGAATGGTCATTGTCAAATATTGTGATAATCCCATTTTAGTTAAGAATAATAC
gi|339282410 -----AATGAATTTCTACAGTGTGGCTAACTCTAACTGTTTGTGCGAATGGTCATTGTCAAATATTGTGATAATCCCATTTTAGTTAAGAATAATAC
gi|339282411 -----AATGAATTTCTACAGTGTGGCTAACTCTAACTGTTTGTGCGAATGGTCATTGTCAAATATTGTGATAATCCCATTTTAGTTAAGAATAATAC
gi|323434336 -----AATGAATTTCTACAGTGTGGCTAACTCTAACTGTTTGTGCGAATGGTCATTGTCAAATATTGTGATAATCCCATTTTAGTTAAGAATAATAC
gi|1519269887 TCGGCACGCTCGGTTTCAGGGTTGTTAATGAATTTCTACAGTGTGGCTAACTCTAACTGTTTGTGCGAATGGTCATTGTCAAATATTGTGATAATCCCATTTTAGTTAAGAATAATAC
gi|1519269930 TCGGCACGCTCGGTTTCAGGGTTGTTAATGAATTTCTACAGTGTGGCTAACTCTAACTGTTTGTGCGAATGGTCATTGTCAAATATTGTGATAATCCCATTTTAGTTAAGAATAATAC
gi|1519270146 TCGGCACGCTCGGTTTCAGGGTTGTTAATGAATTTCTACAGTGTGGCTAACTCTAACTGTTTGTGCGAATGGTCATTGTCAAATATTGTGATAATCCCATTTTAGTTAAGAATAATAC
gi|840914 -----AATGAATTTCTACAGTGTGGCTAACTCTAACTGTTTGTGCGAATGGTCATTGTCAAATATTGTGATAATCCCATTTTAGTTAAGAATAATAC
*** *****

```

SUPPLEMENTAL FIGURE 1. Alignment of 23 sequences of internal transcribed spacer 2 region for *Trichostrongylus* spp. obtained by ClustalW. Underlined are forward Tricho-F and reverse Triho-R primers, and in bold the probe region used in real-time polymerase chain reaction; highlighted is the mismatch present only for the sequence gi | 323434337. Asterisks indicate identical nucleotides.

SUPPLEMENTAL TABLE 1  
Primers and probe used to amplify part of 5.8S-ITS2 region by real-time PCR

| Organism                | Target gene | Primer/probe | Sequence                                   | Final conc. (nM) | Amplicon size (bp) | Reference |
|-------------------------|-------------|--------------|--------------------------------------------|------------------|--------------------|-----------|
| <i>Trichostrongylus</i> | 5.8S-ITS2   | Tricho-F     | 5'-CACGCTCGGTTTCAGGGTTGTTA-3'              | 300              | 76                 | 5         |
|                         |             | Tricho-R     | 5'-GACAATGACCATTCGACAAACAG-3'              | 300              |                    |           |
|                         |             | Trichoprobe  | FAM-5'-ACAGTGTGGCTAACTCTAA-3'-MGB          | 300              |                    |           |
| PhHV-1                  | gB gene     | PhHV-267s    | 5'-GGGCGAATCACAGATTGAATC-3'                | 80               | 89                 | 17        |
|                         |             | PhHV-337as   | 5'-GCGGTTCCAAACGTACCAA-3'                  | 80               |                    |           |
|                         |             | PhHV-305tq   | Cy5-5'-TTTTATGTGTCGGCCACCATCTGGATC-3'-BHQ2 | 200              |                    |           |

BHQ = black hole quencher; F = forward primer; ITS2 = internal transcribed spacer 2 region; MGB = minor groove binder; PhHV = phocine herpes virus type; R = reverse primer.
